# Supplementary material for: Dutch normative data of the sexual distress scale and the body image scale
Source: Springer Nature journal article supplement (doi:10.1007/s11136-023-03434-w), 2023-05-16
Supplement: MOESM1 [file 25370874]

**Journal: Quality of Life Research**

**Dutch normative data of the Sexual Distress Scale and the Body Image Scale**

Anouk S. Huberts MD<sup>1</sup>, Noëlle J.M.C. Vrancken Peeters<sup>2</sup>, Z.L. Rana Kaplan MD<sup>3</sup>, Reinier C.A. van Linschoten MD<sup>4,5</sup>, H. Pastoor<sup>6</sup>, C. Janneke van der Woude MD PhD<sup>5</sup>, Linetta B. Koppert MD PhD<sup>1,2</sup>

<sup>1</sup>Department of Quality and Patientcare, Erasmus University Medical Center, Rotterdam, The Netherlands.

<sup>2</sup>Academic Breast Cancer Center, Department of Surgical Oncology, Erasmus MC Cancer Institute, Erasmus University Medical Center, Rotterdam, The Netherlands

<sup>3</sup>Department of Public Health, Erasmus University Medical Center, Rotterdam, The Netherlands

<sup>4</sup>Department of Gastroenterology & Hepatology, Franciscus Gasthuis & Vlietland, Rotterdam, The Netherlands

<sup>5</sup>Department of Gastroenterology & Hepatology, Erasmus Medical Center, Rotterdam, The Netherlands,

<sup>6</sup> Division of Reproductive Medicine, Department of Obstetrics and Gynecology, Erasmus University Medical Center, Rotterdam, The Netherlands

Corresponding Author:

Anouk Huberts MD

E-mail: [a.huberts@erasmusmc.nl](mailto:a.huberts@erasmusmc.nl)

**Supplementary table 1: Number of responders per age group per gender**

|                | Sexual Distress Scale |             | Body Image scale |             |
|----------------|-----------------------|-------------|------------------|-------------|
|                | Male N(%)             | Female N(%) | Male N(%)        | Female N(%) |
| <b>Overall</b> | 122 (15.9)            | 647 (84.1)  | 113 (16.2)       | 583 (83.5)  |
| <b>18-25</b>   | 13 (1.7)              | 86 (11.1)   | 13 (1.9)         | 77 (11.1)   |
| <b>25-35</b>   | 25 (3.3)              | 207 (26.9)  | 24 (3.4)         | 198 (28.4)  |
| <b>35-45</b>   | 15 (2.0)              | 136 (17.7)  | 13 (1.9)         | 126 (18.1)  |
| <b>45-55</b>   | 31 (4.0)              | 114 (14.8)  | 29 (4.2)         | 101 (14.5)  |
| <b>55-65</b>   | 23 (3.0)              | 82 (10.7)   | 20 (2.9)         | 62 (8.9)    |
| <b>&gt;65</b>  | 15 (2.0)              | 22 (2.9)    | 14 (2.0)         | 19 (2.7)    |

**Supplementary table 2: Sexual Distress Scale Score per age group and gender after weighting**

|                | Male               |             | Female            |             |
|----------------|--------------------|-------------|-------------------|-------------|
|                | Median (IQR)       | Mean (SD)   | Median (IQR)      | Mean (SD)   |
| <b>Overall</b> | 11.0 (4.0 ; 21.0)  | 12.4 (9.5)  | 16.0 (5.0 ; 26.8) | 16.8 (12.4) |
| <b>18-25</b>   | 4.0 (4.0 ; 7.0)    | 7.9 (7.1)   | 18.5 (4.0 ; 31.0) | 17.9 (13.0) |
| <b>25-35</b>   | 11.0 (5.0 ; 11.0)  | 10.2 (6.4)  | 12.4 (5.0 ; 23.0) | 15.0 (11.5) |
| <b>35-45</b>   | 9.0 (1.0 ; 19.0)   | 11.1 (9.7)  | 18.0 (6.0 ; 27.2) | 17.6 (11.9) |
| <b>45-55</b>   | 11.0 (0.7 ; 23.0)  | 12.0 (10.3) | 15.0 (6.0 ; 24.3) | 16.1 (12.3) |
| <b>55-65</b>   | 20.0 (9.0 ; 24.0)  | 18.5 (10.4) | 18.0 (8.0 ; 24.2) | 16.5 (10.4) |
| <b>&gt;65</b>  | 13.0 (10.0 ; 21.0) | 15.2 (6.9)  | 15.0 (2.0 ; 33.0) | 17.7 (15.5) |

**Supplementary table 3: Body Image Scale Score of sum score of questions 1,3,5,7, and 9 per age group and gender after weighting**

|                | Male            |           | Female           |           |
|----------------|-----------------|-----------|------------------|-----------|
|                | Median (IQR)    | Mean (SD) | Median (IQR)     | Mean (SD) |
| <b>Overall</b> | 4.0 (2.0 ; 7.0) | 4.6 (3.9) | 5.0 (2.9 ; 9.0)  | 6.0 (4.4) |
| <b>18-25</b>   | 5.0 (4.0 ; 9.0) | 6.5 (4.1) | 8.4 (4.4 ; 12.0) | 8.0 (4.9) |
| <b>25-35</b>   | 3.0 (2.0 ; 7.0) | 4.3 (4.0) | 5.0 (2.9 ; 9.0)  | 6.2 (4.5) |
| <b>35-45</b>   | 3.0 (1.0 ; 8.0) | 4.6 (4.3) | 7.0 (3.0 ; 11.0) | 7.0 (4.6) |
| <b>45-55</b>   | 4.8 (2.0 ; 8.0) | 5.2 (3.7) | 5.9 (2.0 ; 9.0)  | 5.7 (4.1) |
| <b>55-65</b>   | 3.0 (1.0 ; 5.0) | 3.9 (3.5) | 4.0 (2.0 ; 7.0)  | 5.1 (4.0) |
| <b>&gt;65</b>  | 3.0 (1.0 ; 5.0) | 3.1 (2.6) | 4.0 (2.0 ; 5.0)  | 3.8 (2.7) |
